# Supplementary material
Source: publisher figshare collection journal article supplement (https://gsajournals.figshare.com/ndownloader/files/18044747)
Supplement: Supplementary file 1 [file 18044747]

## Sheet: Sheet1
Inversion Size (Mb)	Median Minimum Ratio	Range of Minimum Ratios	Proportion Overlap with Inversions of Length 0
0	0.99999	0.99993-1	N/A
0.5	0.99985	0.99975-0.99994	0.04
1	0.99948	0.99902-0.99972	0
2.5	0.99714	0.99556-0.99835	0
5	0.98837	0.98363-0.99200	0
10	0.95494	0.94684-0.98013	0
